# Supplementary material
Source: Springer Nature journal article supplement (https://www.springermedizin.de/resource/supplementary/13048_2010_51_MOESM4_ESM.pdf/9664790)

A.

#3508-3508 RT:18.94-18.94 NL: 4.65E3

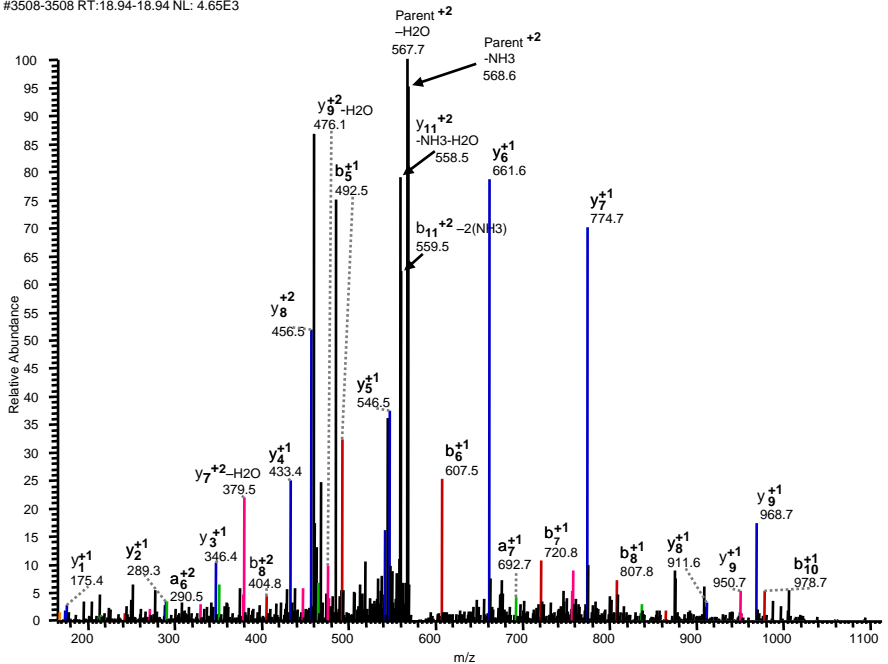

B.

| b     | b <sup>+2</sup> |    | y    | y <sup>+2</sup> |
|-------|-----------------|----|------|-----------------|
| ---   | ---             | 1  | A 11 | ---             |
| 185.3 | ---             | 2  | L 10 | 1082.2 541.6    |
| 242.3 | ---             | 3  | G 9  | 969.1 485.1     |
| 379.4 | 190.2           | 4  | H 8  | 911.9 456.5     |
| 492.6 | 246.8           | 5  | L 7  | 774.8 387.9     |
| 607.7 | 304.3           | 6  | D 6  | 661.6 331.3     |
| 720.9 | 360.9           | 7  | L 5  | 546.6 273.8     |
| 807.9 | 404.5           | 8  | S 4  | 433.4 217.2     |
| 864.9 | 432.9           | 9  | G 3  | 346.3 173.7     |
| 979.1 | 490.0           | 10 | N 2  | 289.3 145.2     |
| ---   | 559.5           | 11 | R 1  | 175.2 88.1      |

C.

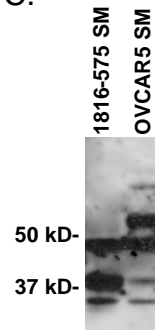

Supplement: MOESM4 [file 9664790]
